# Supplementary material for: Introducing third-generation periodic table descriptors for nano-qRASTR modeling of zebrafish toxicity of metal oxide nanoparticles
Source: publisher site journal article supplement (doi:10.3762/bjnano.15.93), 2024-09-10
Supplement: Additional file 2 [file 2190-4286-15-93-S2.pdf]

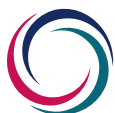

## Supporting Information

for

### **Introducing third-generation periodic table descriptors for nano-qRASTR modeling of zebrafish toxicity of metal oxide nanoparticles**

Supratik Kar and Siyun Yang

*Beilstein J. Nanotechnol.* **2024**, *15*, 1142–1152. [doi:10.3762/bjnano.15.93](https://doi.org/10.3762/bjnano.15.93)

## Content of the study in QMRF format

# Quantitative Structure–Activity Relationship (QSAR) Model Reporting Format (QMRF)

## 1. QSAR Model Identification

### 1.1. QSAR identifier (title)

Enhancing Nano-qRASTR Modeling of Zebrafish Toxicity of Metal Oxide Nanoparticles using Third-Generation Periodic Table Descriptors

### 1.2 Other related models

None

### 1.3. Software coding the model

BSS-MLR v2.1, MLRPlusValidation 1.3, RASAR-Desc-Calc-v2.0

## 2. General information

### 2.0 Abstract

This study develops and enhances predictive models for zebrafish toxicity assessment of metal oxide nanoparticles (MONPs). By integrating traditional QSAR techniques with read-across approaches, the nano-qRASTR model addresses data gaps and improves the reliability of toxicity predictions.

### 2.1. Date of QMRF

26 July 2024

### 2.2. QMRF author(s) and contact details

Dr. Supratik Kar, Department of Chemistry, Kean University, [skar@kean.edu](mailto:skar@kean.edu)

### 2.3. Date of QMRF update(s)

N/A

### 2.4. QMRF update(s)

N/A

### 2.5. Model developer(s) and contact details

Dr. Supratik Kar, Department of Chemistry, Kean University, [skar@kean.edu](mailto:skar@kean.edu)

### 2.6. Date of model development and/or publication

2024

### 2.7. Reference(s) to main scientific papers and/or software package

- Kar, S.; Gajewicz, A.; Puzyn, T.; Roy, K.; Leszczynski, J. *Ecotoxicol. Environ. Saf.* 2014, 107, 162-169.
- De, P.; Kar, S.; Roy, K.; Leszczynski, J. *Environ. Sci. Nano* 2018, 5, 2742-2760.

- Khan, K.; Khan, P. M.; Lavado, G.; Valsecchi, C.; Pasqualini, J.; Baderna, D.; Marzo, M.; Lombardo, A.; Roy, K.; Benfenati, E. Chemosphere 2019, 229, 8-17.
- Yang, S.; Kar, S. Science of The Total Environment 2024, 907, 167991.
- Banerjee, A.; Roy, K. Mol. Divers. 2022, 26, 2847-2862.

### **2.8. Availability of information about the model**

The model is non-proprietary. Full description of the model algorithm, training, and test sets are available as supplementary material of the original research article.

### **2.9. Availability of another QMRF for exactly the same model**

None

## **3. Defining the endpoint - OECD Principle 1: "A DEFINED ENDPOINT"**

### **3.1. Species**

Zebrafish (*Danio rerio*)

### **3.2. Endpoint**

Enzyme inhibition (%EI\_Zebrafish) of zebrafish hatching enzyme (ZHE1)

### **3.3 Comment on endpoint**

Zebrafish embryos are used to evaluate the toxicity of MONPs. The endpoint measures the percentage decrease in enzymatic activity of ZHE1.

### **3.4. Endpoint units**

Percentage (%)

### **3.5. Dependent variable**

%EI\_Zebrafish

### **3.6. Experimental protocol**

The experimental protocol followed OECD guidelines for toxicological studies in zebrafish embryos. All data are collected from literature as mentioned in the article.

### **3.7. Endpoint data quality and variability**

Data quality was ensured through repeatability and reproducibility checks. The purity of test chemicals was maintained at high levels to ensure accurate correlations between structures and effects. All data are collected from literature as mentioned in the article.

## **4. Defining the algorithm - OECD Principle 2: "AN UNAMBIGUOUS ALGORITHM"**

### **4.1. Type of model**

Equation-based, multiple linear regression (MLR)

### **4.2. Explicit algorithm**

qRASTR model:

$$\%EI_{Zebrafish} = -2.01(\pm 4.38) + 0.17(\pm 0.06) * (\sum\alpha)^2 + 5.10(\pm 0.84) * SE(LK) \\ - 10.93(\pm 5.83) * CVsim(LK)$$

### 4.3. Descriptors in the model

$\sum\alpha^2$  (Summation of squared alpha), SE(LK) (Standard error of the response values), CVsim(LK) (Coefficient of variation of the similarity values)

### 4.4. Descriptor selection

Descriptors were selected using the Best Subset Selection (BSS) approach, evaluating all possible subsets of descriptors to determine the best combination.

### 4.5. Algorithm and descriptor generation

Descriptors were derived from periodic table properties and computed using the RASAR-Desc-Calc-v2.0 tool.

### 4.6. Software name and version for descriptor generation

RASAR-Desc-Calc-v2.0, BSS-MLR v2.1, MLRPlusValidation 1.3

### 4.7. Chemicals/Descriptors ratio

16 chemicals (training set) / 3 descriptors = 5.33

## 5. Defining the applicability domain - OECD Principle 3: "A DEFINED DOMAIN OF APPLICABILITY"

### 5.1. Description of the applicability domain of the model

The model's applicability domain was defined using the leverage approach, identifying structural features, descriptor space, and response space for reliable predictions.

### 5.2. Method used to assess the applicability domain

Williams plot was used to assess the applicability domain, with leverage critical value identifying influential observations and outliers.

### 5.3. Software name and version for applicability domain assessment

MLRPlusValidation 1.3

### 5.4. Limits of applicability

The model is applicable to MONPs with similar structural and physicochemical properties to those in the training set.

## 6. Defining goodness-of-fit and robustness (internal validation) – OECD Principle 4: "APPROPRIATE MEASURES OF GOODNESS-OF-FIT, ROBUSTNESS AND PREDICTIVITY"

### 6.1. Availability of the training set

The training set is available and attached as supporting information.

## **6.2. Available information for the training set**

MONPs name, Descriptor values, Dependent variable values

## **6.3. Data for each descriptor variable for the training set**

Available and attached as supporting information.

## **6.4. Data for the dependent variable for the training set**

Available and attached as supporting information.

## **6.5. Other information about the training set**

16 MONPs were selected based on their relevance and data availability.

## **6.6. Pre-processing of data before modelling**

N/A

## **6.7. Statistics for goodness-of-fit**

$R^2 = 0.81$ ,  $R^2_{\text{adjusted}} = 0.77$

## **6.8. Robustness - Statistics obtained by leave-one-out cross-validation**

$Q^2_{\text{LOO}} = 0.70$

## **6.9. Robustness - Statistics obtained by leave-many-out cross-validation**

N/A

## **6.10. Robustness - Statistics obtained by Y-scrambling**

Average  $R^2 = 0.20$  and Average  $Q^2 = -0.60$  of random 100 models

## **6.11. Robustness - Statistics obtained by bootstrap**

N/A

## **6.12. Robustness - Statistics obtained by other methods**

N/A

# **7. Defining predictivity (external validation) – OECD Principle 4: "APPROPRIATE MEASURES OF GOODNESS-OF-FIT, ROBUSTNESS AND PREDICTIVITY"**

## **7.1. Availability of the external validation set**

The external validation set (test set) is available and attached as supporting information.

## **7.2. Available information for the external validation set**

MONPs name, Descriptor values, Dependent variable values

## **7.3. Data for each descriptor variable for the external validation set**

Available and attached as supporting information.

## **7.4. Data for the dependent variable for the external validation set**

Available and attached as supporting information.

### **7.5. Other information about the external validation set**

8 MONPs were included for external validation (test set).

### **7.6. Experimental design of test set**

Randomly selected from available MONPs data.

### **7.7. Predictivity - Statistics obtained by external validation**

$R^2 = 0.81$ ,  $Q^2_{F1} = 0.76$ ,  $Q^2_{F2} = 0.74$

### **7.8. Predictivity - Assessment of the external validation set**

The external validation set (test set) is representative of the training set's descriptor and response space.

### **7.9. Comments on the external validation of the model**

The model demonstrates high predictivity for an external validation (test set) comprising 8 MONPs.

## **8. Providing a mechanistic interpretation - OECD Principle 5: "A MECHANISTIC INTERPRETATION, IF POSSIBLE"**

### **8.1. Mechanistic basis of the model**

The model's mechanistic basis is the interaction of MONPs with biological systems influenced by their electronegativity, molecular bulk, and atomic radius. Incorporating third-generation descriptors enhances the predictive power of the nano-qRASTR model. MONPs with higher metal electronegativity may bind strongly to zebrafish, potentially interfering with cellular functions, but this can also mitigate oxidative stress and membrane disruption, reducing toxicity. Conversely, MONPs with larger atomic and crystal ionic radii have a lower surface area-to-volume ratio, reducing cellular interactions and uptake, thus lessening toxicity. Larger atomic radii may prevent MONPs from penetrating cell membranes, decreasing potential damage. However, increased molecular bulk in MONPs can enhance toxicity by physically damaging cell membranes, triggering reactive oxygen species (ROS) production, and obstructing vital biological processes, leading to localized toxicity and accumulation within zebrafish, worsening toxicity.

### **8.2. A priori or a posteriori mechanistic interpretation**

A posteriori mechanistic interpretation was conducted based on model results and descriptor analysis.

### **8.3. Other information about the mechanistic interpretation**

Higher metal electronegativity and larger atomic radii decrease toxicity, while increased molecular bulk enhances toxicity through mechanisms like ROS production and cellular uptake.

## **9. Miscellaneous information**

### **9.1. Comments**

The model shows significant improvements over previous nano-QSTR models and can be used to predict the toxicity of new MONPs before experimental testing. For the toxicity data gap of MONPs, 35 MONPs were collected as a true external set and predicted toxicity in zebrafish, with

27 predictions within the Applicability Domain (AD), yielding a 77.14% reliability. For these MONPs, enzyme inhibition (%EI) ranged from 32.42% to 76.16%. Ta<sub>2</sub>O<sub>3</sub> exhibited the highest toxicity, while V<sub>2</sub>O<sub>3</sub> showed the least. Eight MONPs were deemed unreliable, falling outside the AD.

## 9.2. Bibliography

- Basant, N.; Gupta, S. *Nanotoxicology* 2017, 11, 339-350.
- Kar, S.; Gajewicz, A.; Roy, K.; Leszczynski, J.; Puzyn, T. *Ecotoxicol. Environ. Saf.* 2016, 126, 238-244.
- Thwala, M. M.; Afantitis, A.; Papadiamantis, A. G.; Tsoumanis, A.; Melagraki, G.; Dlamini, L. N.; Ouma, C. N. M.; Ramasami, P.; Harris, R.; Puzyn, T.; Sanabria, N.; Lynch, I.; Gulumian, M. *Struct. Chem.* **2022**, 33, 527-538.
- Lin, S.; Zhao, Y.; Ji, Z.; Ear, J.; Chang, C. H.; Zhang, H.; Low-Kam, C.; Yamada, K.; Meng, H.; Wang, X.; Liu, R.; Pokhrel, S.; Mädler, L.; Damoiseaux, R.; Xia, T.; Godwin, H.A.; Lin, S.; Nel, A.E. *Small* **2013**, 9, 1776-1785.

## 9.3. Supporting information

Names of the MONPs, descriptor values, and response values for the training, external validation (test sets) and true external set are provided under supplementary material.
